# Supplementary material for: The cost-effectiveness of transcatheter aortic valve implantation versus surgical aortic valve replacement in patients with severe aortic stenosis at high operative risk
Source: HighWire-hosted journal article supplement (doi:10.1136/heartjnl-2013-303722), 2013-05-21
Supplement: heartjnl-2013-303722supp.pdf [file heartjnl-2013-303722supp.pdf]

## Supplementary material

### Appendix A: Structure of the decision model

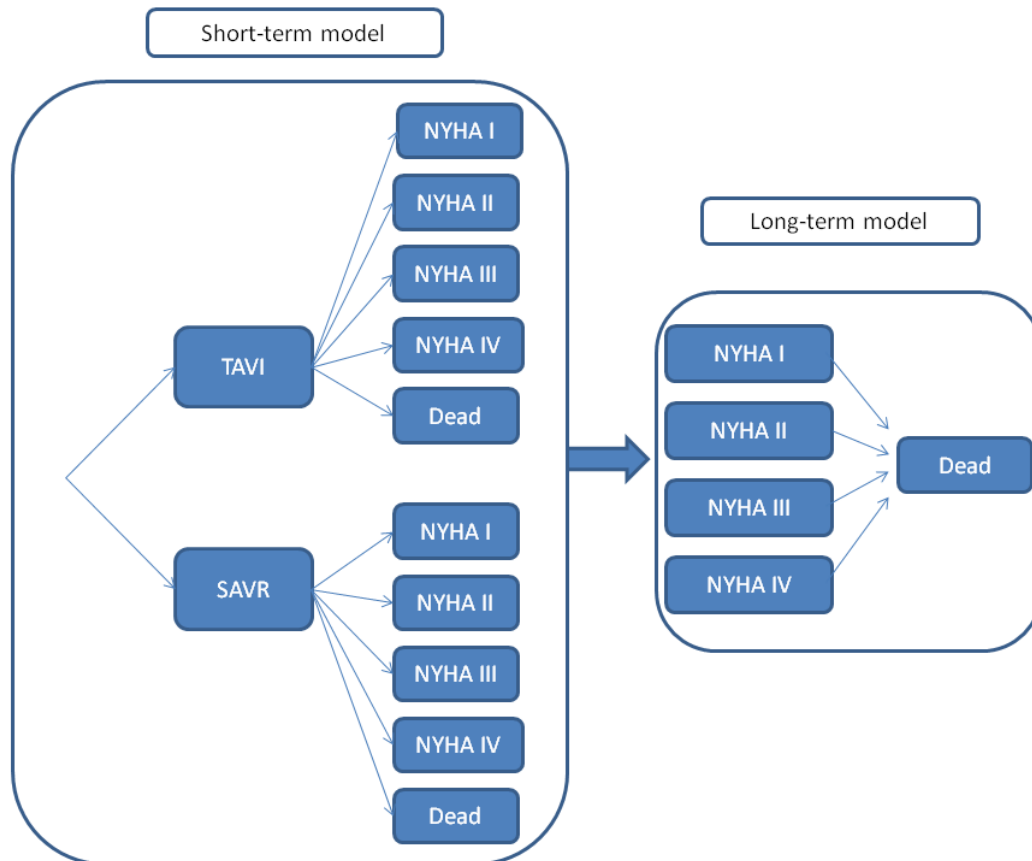

## Appendix B: Sensitivity analyses parameter values

| Parameter                                           | Analysis | Source                   |
|-----------------------------------------------------|----------|--------------------------|
| <b>Costs</b>                                        |          |                          |
| Procedural costs                                    | -/+ 25%  | N/A                      |
| Complication costs                                  | -/+ 25%  | N/A                      |
| Weekly care costs by NYHA                           | -/+ 25%  | N/A                      |
| TAVI Length of ICU stay                             | 2        | Zahn (2010)              |
| TAVI tariff price                                   | £25,000  | N/A                      |
| <b>Utility</b>                                      |          |                          |
| Alternative Utility values by NYHA                  |          |                          |
| I                                                   | 0.85     | Maliwa (2003)            |
| II                                                  | 0.71     | Maliwa (2003)            |
| III                                                 | 0.57     | Maliwa (2003)            |
| IV                                                  | 0.43     | Maliwa (2003)            |
| Complication utility decrement                      | +25%     |                          |
| <b>TAVI Event probabilities</b>                     |          |                          |
| <b>UK Registry data</b>                             |          | Moat et al (2011)        |
| <b>TAVI extreme values ('worst case' scenario):</b> |          |                          |
| Multiple valve                                      | 0.036    | Tamburino et al (2011)   |
| Permanent pacemaker                                 | 0.393    | Zahn et al (2011)        |
| Major stroke                                        | 0.1      | Buellesfeld et al (2010) |
| Myocardial Infarction                               | 0.086    | Gurvitch et al (2010)    |
| Vascular complication                               | 0.324    | Leon et al (2011)        |
| Major bleed                                         | 0.032    | Tamburino et al (2011)   |
| Renal replacement for kidney failure                | 0.017    | Leon et al (2011)        |
| New Atrial Fibrillation                             | 0.06     | Leon et al (2011)        |
| Hospitalisation hazard rate by NYHA                 | -/+ 25%  |                          |
| <b>Discount rate</b>                                | 1%/6%    | N/A                      |

**Appendix C: New York Health Association classification proportions over a 10 year horizon**

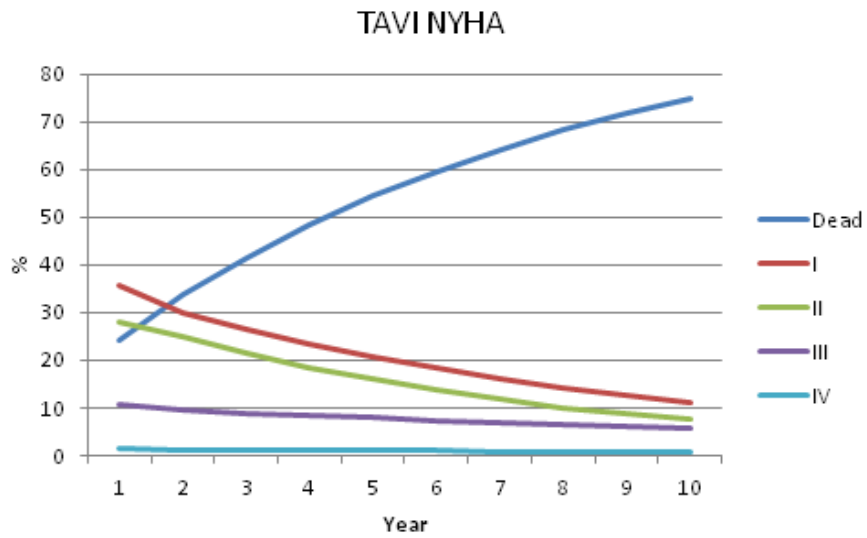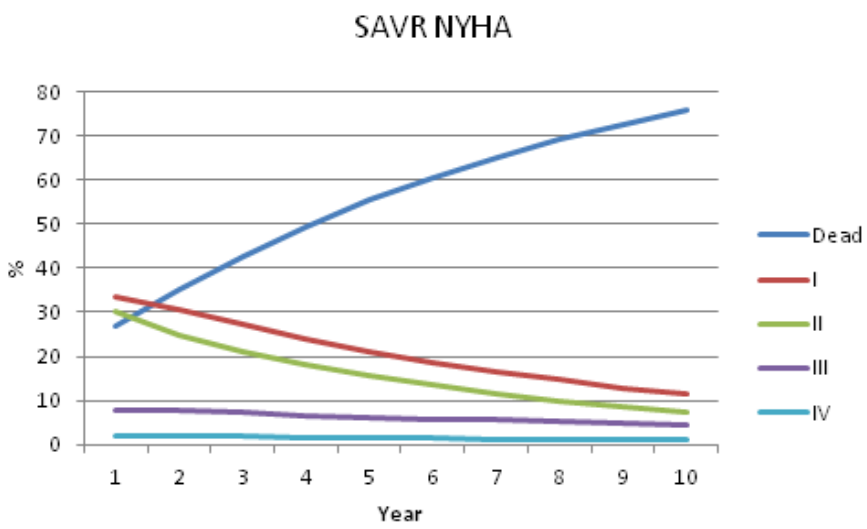

NYHA= New York health association; TAVI = transcatheter aortic valve implantation
